1 **Water quality and microbial load: a double-threshold identification procedure intended**  
2 **for space applications**

3

4 **Authors:**

5 Stefano Amalfitano<sup>1\*</sup>, Caterina Levantesi<sup>1</sup>, Laurent Garrelly<sup>2</sup>, Donatella Giacosa<sup>3</sup>, Francesca  
6 Bersani<sup>3</sup>, Simona Rossetti<sup>1</sup>

7

8 **Institutions:**

9 <sup>1</sup>Water Research Institute – National Research Council of Italy (IRSA-CNR), Via Salaria Km  
10 29,300, 00015 Monterotondo, Roma, Italy

11 <sup>2</sup>GLBiocontrol, 9, avenue de l'Europe, Cap Alpha, F-34 830 Clapiers, France

12 <sup>3</sup>Centro Ricerche SMAT, Società Metropolitana Acque Torino S.p.A., C.so Unità d'Italia  
13 235/3, 10127 Torino, Italy

14

15 \*Corresponding author.

16 E-mail address: amalfitano@irsa.cnr.it

17

18 **Keywords**

19 Water quality standards; confidence values; microbial contamination; aquatic bacteria

20

21

22 **Abstract**

23 During longer-lasting future space missions, water renewal by ground-loaded supplies will  
24 become increasingly expensive and unmanageable for months. Space exploration by self-  
25 sufficient space-crafts is thus demanding the development of culture-independent  
26 microbiological methods for in-flight water monitoring to counteract possible contamination  
27 risks. In this study, we aimed at evaluating microbial load data assessed by selected  
28 techniques with current or promising perspectives in space applications (i.e., HPC, ATP-  
29 metry, qPCR, flow cytometry), through the analysis of water sources with constitutively  
30 different contamination levels (i.e., chlorinated and unchlorinated tap waters, groundwaters,  
31 river waters, wastewaters). Using a data-driven double-threshold identification procedure, we  
32 identified and presented new alternative standards of water quality based on the assessment of  
33 the total microbial load. Our approach is suitable to provide an immediate alert of microbial  
34 load peaks, thus enhancing the crew responsiveness in case of unexpected events due to water  
35 contamination and treatment failure. Finally, the backbone dataset could help in managing  
36 water quality and monitoring issues for both space and Earth-based applications.

37

38

## 39 **1 Introduction**

40 Aquatic microbes are retained as primary constituents of all known water sources aboard the  
41 International Space Station (ISS), as well as in future human spaceflights and planetary  
42 outposts (Horneck et al., 2010). Since space missions are expected to become longer lasting,  
43 space exploration is demanding the development of methods for in-flight monitoring, suitable  
44 to face microbial contamination risks within human confined conditions (Allen et al., 2018;  
45 Karouia et al., 2017; Yamaguchi et al., 2014). NASA has been developed microbial control  
46 strategies to minimize detrimental cell growth during spaceflight by reducing humidity,  
47 eliminating free water, and maintaining high-volume exchange and air filtration. The ISS is  
48 maintained at around 22°C with a relative humidity of around 60%, with pressure and oxygen  
49 concentrations very close to those at sea level on Earth (Pierson et al., 2013).

50 Currently on ISS, water samples are archived every 6 months for further post-flight analysis.  
51 In addition, samples are processed in-flight once every three months with the US-supplied  
52 Water Microbiology Kit for the quantification of heterotrophic bacteria (Heterotrophic Plate  
53 Counts - HPC) and the presence of coliforms (Van Houdt et al., 2012). Leaving aside the  
54 evidence that the microbial biomass is mainly composed by viable but not cultivable  
55 microorganisms (Colwell, 2009), the development of culture-independent methods for space  
56 applications is pushed fundamentally by the requirement of timeliness of results and the need  
57 to avoid microbial regrowth from analytical wastes. Candidate methods have to comply with  
58 limitations in volume, working time, power, safety and microgravity, thus being suitable for  
59 automation, lightweight and with minimal consumables. Since first experiments conducted in  
60 space, bioluminescence and PCR-based methods have been tested for monitoring the  
61 microbial load under microgravity conditions (Castro et al., 2004; Guarnieri et al., 1997; La  
62 Duc et al., 2004). Currently, joint scientific and industrial efforts have been focused on  
63 developing an on-line self-loading ATP-based monitoring module within an integrated  
64 breadboard system to control microbial contamination in water systems during human

65 spaceflights. The module contains ATP-releasing reagents to lyse cells and release ATP,  
66 which reacts with d-luciferin in presence of luciferase to produce detectable light signals. The  
67 light intensity is then measured as Relative Light Units (RLU), which can be interpreted as a  
68 measure of ATP concentration (i.e., H2020 EU project “Biocontamination Integrated Control  
69 of Wet Systems for Space Exploration”, <http://biowyse.eu/>). Moreover on the ISS,  
70 biomolecular methods and sample processing for DNA extraction and gene sequencing has  
71 been tested within dedicated projects (e.g., Genes in Space-3, Wet-lab2) and through  
72 customized devices (e.g., miniPCR, MinION, Razor EX PCR) (Boguraev et al., 2017;  
73 Karouia et al., 2017; Parra et al., 2017). The quantitative real-time PCR (qPCR) could be  
74 applied to assess the absolute bacterial abundance by measuring the number of 16S rRNA  
75 housekeeping gene copies in the total DNA extracted from a water sample (Smith and  
76 Osborn, 2009). Among the consolidated water monitoring approaches for the direct  
77 quantification of aquatic microorganisms, flow cytometry (FCM) has to be also considered,  
78 since it was defined as an unparalleled high-throughput technology for single cell counting  
79 and characterization in a panoply of applications (Robinson and Roederer, 2015). The basic  
80 cytometric detection combines laser light scatter and fluorescence signals, with the ability to  
81 discriminate microbial cell subpopulations, phenotypes (e.g., size and shape), and constitutive  
82 properties detected upon specific staining procedures (e.g., per-cell nucleic acid content)  
83 (Wang et al., 2010).

84 By largely disregarding recent monitoring techniques and their methodological  
85 improvements, current standards for microbiological evaluations are set on the occurrence of  
86 few microorganisms, indicators of fecal pollution and hence of the possible co-presence of  
87 pathogenic species (European Union, 1998). Microbial specifications and monitoring  
88 requirements for ISS waters have fixed the limit of HPC  $\leq$  50 CFU/ml to meet the onboard  
89 quality standards in U.S. and Russian segments (Duncan et al., 2008). However, the space  
90 water microbiology was recently pushed beyond the standardized cultivation-based methods

91 (Moissl-eichinger et al., 2016), also due to the finding that spaceflight microgravity  
92 conditions provided conflicting results, with insufficient and largely unpredictable indications  
93 on the microbial growth patterns and the virulence of opportunistic human pathogens (Huang  
94 et al., 2018).

95 In this study, we explored whether alternative methods to assess the water microbial load  
96 could be supportive of routine monitoring practices, thus challenging conventional  
97 heterotrophic plate counts in space applications. Through the analysis of water sources with  
98 constitutively different microbial loads (i.e., chlorinated and unchlorinated tap waters,  
99 groundwaters, river waters, wastewaters), we aimed to (i) cross-validate candidate techniques  
100 suitable to assess the onboard water microbial load and selected among those consolidated in  
101 terrestrial applications (i.e., HPC, ATP-metry, qPCR, FCM), and (ii) propose a data-driven  
102 procedure to determine new water quality standards based on the cultivation-independent  
103 assessment of the total microbial load.

104 By considering the high costs and logistic limitations of water renewal with Earth-supplied  
105 resources, we hypothesized that a double-threshold identification procedure could be  
106 applicable to identify water microbial contamination events and help counteracting health-  
107 risks, which could unexpectedly occur during longer-lasting space missions.

108

## 109 **2 Material and methods**

### 110 **2.1 Selection and collection of water samples**

111 Water samples were collected in one-liter sterile plastic bottles containing pre-dosed sodium  
112 thiosulfate (1 ml of 10% solution per bottle), transported in refrigerated boxes and stored at 5  
113  $\pm 3^{\circ}\text{C}$  for maximum 24 hours before analysis. A total of 35 samples was drawn from five  
114 types of water sources with a naturally different microbial load. Each water type was  
115 represented by seven independent samples: chlorinated Tap Water (cTW1-7), unchlorinated

116 Tap Water (uTW1-7), Ground Water (GW1-7), River Water (RW1-7), and Waste Water  
117 (WW1-7).

118 Turbidity was measured in all samples and expressed as nephelometric turbidity units (NTU).  
119 The chlorinated tap waters (cTWs = 0.2-0.3 NTU) were collected along the drinking water  
120 distribution network, namely at the inlet of water kiosks in seven towns supplied by SMAT in  
121 the province of Turin (Italy). All cTWs were disinfected with sodium hypochlorite (final  
122 concentration 0.1-0.2 mg/l). Unchlorinated tap waters (uTWs = 0.1-0.5 NTU) were gathered  
123 at the granular activated carbon filter outlets of a drinking water treatment plant, following  
124 sedimentation, break-point chlorination, chlorine-dioxide peroxidation and clariflocculation  
125 with polyhydroxy aluminium chloride. Groundwater samples (GWs = 0.2-7.2 NTU) were  
126 collected from wells located in the urban area of Turin (Italy), before any kind of subsequent  
127 treatment. River water samples (RW = 0.2-1.8 NTU) were collected from water catchment  
128 areas upstream different drinking water treatment plants. Wastewater samples (WWs = 1.0-  
129 9.6 NTU) were collected from secondary effluents of activated-sludge wastewater treatment  
130 plants.

131

## 132 **2.2 Plate cultivation and heterotrophic plate counts**

133 Heterotrophic plate counts (HPC) were performed on 90-mm Petri dishes filled with either  
134 Yeast Extract Agar (YEA) medium (Sifin Diagnostics, Germany) or Reasoner's 2A Agar  
135 (R2A) medium (Thermofisher Diagnostics, US) (APHA, 2005; ISO6222, 1999). Following  
136 lab incubation at 22°C for three or seven days, all results derived from the average of two  
137 plates, each within the countable range. Depending on the expected microbial concentrations,  
138 different volumes (from 1 ml to 100 ml) were analyzed in order to reach a measurable range  
139 in terms of colony forming units (CFUs). Volumes up to 1 ml were included in molten  
140 medium, while larger volumes (up to 100 ml) were filtered onto cellulose nitrate membranes  
141 (0.45- $\mu$ m pore size; Millipore).

142

### 143 **2.3 ATP-metry**

144 The total intracellular ATP content was measured to estimate the microbial load using the  
145 technology developed by GL Biocontrol (Clapiers, France). Briefly, 2 drops of DENDRIAG  
146 reagent were added to the water sample (10-50 ml) and measured using the GL Biocontrol  
147 instrument to obtain the R1 (RLU) result. Then four drops of DENDRIAG reagent were  
148 dispensed into the plastic packaging of the filter and the reactive was backflush by pressing  
149 air through the filter. The reagent was pushed into the measuring tube and measured to obtain  
150 the R1 (RLU) result. Then, one drop of STANDARD 1000 reagent was added and measured  
151 to obtain the R2 (RLU) result. The concentration of intracellular ATP is given in picograms  
152 per milliliter, by the following calculations:

153

$$154 \quad \text{Standard (RLU/pg)} = \frac{R2-R1}{1000}$$

$$155 \quad [\text{ATP}] (\text{pg/ml}) = \frac{R1}{\text{Standard} \times V}$$

156

157 With R1 (RLU): sample result; R2 (RLU): sample + standard result; V (ml) volume of water  
158 analyzed.

159

### 160 **2.4 DNA extraction and quantitative real-time PCR**

161 The qPCR Sybr Green assay was utilized to measure the 16S rDNA gene copy number in 25  
162  $\mu\text{l}$  of sample using the CFX96 Touch Real Time PCR Detection System (Bio-Rad, USA).  
163 Reactions contained 5  $\mu\text{l}$  of DNA template (from 50 to 5 ng DNA for reaction tube), 12.5  $\mu\text{L}$   
164 of 2X SYBR Green Supermix (Bio-Rad USA), and primers at required concentrations (Di  
165 Cesare et al., 2015). Triplicates samples and no template controls (NTCs) were analyzed. The  
166 *E.coli* 16S rDNA was used as positive control, and standard curves were produced with gene

167 copy numbers from  $10^2$  to  $10^6$  genes per reaction tube. The concentration of the amplified  
168 DNA was determined using NanoDrop spectrophotometer. The gene copy number per  $\mu\text{l}$  of  
169 solution was calculated according to literature reports (Czekalski et al., 2012). The qPCR  
170 results were reported as the mean of measurements of triplicates analysis with standard  
171 deviations. Data were analyzed with the CFX Manager<sup>TM</sup> software v3.1 (Bio-Rad, Italy).

172

### 173 **2.5 Flow cytometry**

174 The aquatic microbial cells were characterized by using the Flow Cytometer A50-micro  
175 (Apogee Flow System, Hertfordshire, England) equipped with a solid state laser set at 20 mV  
176 and tuned to an excitation wave length of 488 nm. The volumetric absolute counting was  
177 carried out on fixed (2% formaldehyde, final concentration) and unfixed water samples,  
178 stained with SYBR Green I (1:10000 dilution; Molecular Probes, Invitrogen) or with SYBR  
179 Green I and propidium iodide ( $\text{PI} = 10 \mu\text{g ml}^{-1}$ , f.c.) for 10 min in the dark at room  
180 temperature. The light scattering signals (forward and side scatters), the green fluorescence  
181 (530/30 nm) and red fluorescence ( $> 610 \text{ nm}$ ) were acquired for the single cell  
182 characterization. A fluorescence threshold was set at 10 units on the green channel. Samples  
183 were run at low flow rates to keep the number of events below 1000 events per second. The  
184 total number of prokaryotic cells (i.e., total cell counts – TCC) was determined by their  
185 signatures in a plot of the side scatter vs the green fluorescence (Gasol and Morán, 2015).  
186 Live and dead cells were differentiated in a plot of green vs red fluorescence. Viable cells  
187 (i.e., intact cell counts - ICC) showed higher green fluorescence signals than the membrane  
188 compromised dead cells selectively marked in red by propidium iodide (Grégori et al., 2018).  
189 The instrumental settings were kept the same for all samples in order to achieve comparable  
190 data. The data were analyzed using the Apogee Histogram Software v2.05.  
191 Total cell counts were double-checked by epifluorescence microscopy on all samples by  
192 following consolidated literature procedures (Porter and Feig, 1980). Briefly, aliquots of fixed



193 samples were filtered through 0.2  $\mu\text{m}$  polycarbonate filters ( $\text{\O}$  25 mm, Millipore) by gentle  
194 vacuum ( $<0.2$  bar), and stained for 5 min with DAPI (4', 6-diamidino-2-phenylindole; 1.5  $\mu\text{g}$   
195  $\text{ml}^{-1}$  final concentration). Filters were stored at  $-20^{\circ}\text{C}$  until microscope inspection. Total cell  
196 counts were performed by the epifluorescence microscope BX51 (Olympus, Germany) at  
197 1500X magnification by counting a minimum of 300 cells in  $>10$  microscopic fields  
198 randomly selected across each filter.

199

## 200 **2.6 Data elaboration and statistical analysis**

201 All data were  $\log(x+1)$  transformed to facilitate comparability among parameters derived  
202 from different methods and waters sources. The nonparametric Kruskal-Wallis test, with  
203 Mann-Whitney post-hoc pairwise comparisons, was used to verify whether statistical  
204 differences in median values occurred among water groups according to each single  
205 parameter. The one-way nonparametric multivariate analysis of variance (PERMANOVA),  
206 based on the Euclidean distance measure, was used to test the overall significance of  
207 difference between water groups.

208 A frequency distribution model (FDM) of log-transformed data was applied to discriminate  
209 between two water groups, hereafter named waters with low and high microbial load. The  
210 number of bins was set at 4 for each single-parameter data series (Wand, 1997). Following the  
211 consolidated approach applied to assess upper confidence limits for natural background  
212 chemical concentrations (USEPA, 2002), a first confidence threshold (hereafter named  
213 warning threshold) was set as the 95th percentile of values assessed from the low microbial  
214 load group. A second and higher confidence threshold (hereafter named alarm threshold) was  
215 arbitrarily set as the 5<sup>th</sup> percentile of values assessed from the high microbial load group.  
216 The linear regression model (LRM) was applied in order to cross-validate the FDM thresholds  
217 using the possible combinations of log-transformed independent parameters (i.e., HPC-R2A  
218 vs ATP; HPC-R2A vs qPCR; HPC-R2A vs FCM-ICC; ATP vs qPCR; ATP vs FCM-ICC;

219 qPCR vs FCM-ICC). Spearman's correlation coefficients ( $r$ ) were used for the LRM  
220 statistical endorsement. Warning and alarm threshold values, computed by the FDM on single  
221 parameters, were applied to each LRM to calculate the corresponding values from linear  
222 correlation equations. The mean values ( $\pm$  standard deviation) of four data-driven estimates of  
223 warning and alarm thresholds (i.e., one from FDMs plus three from LRMs) of each  
224 independent parameter were calculated and presented as alternative standards of water  
225 quality. All data elaborations were performed by the software PAST v3.20 (Hammer et al.,  
226 2001).

227

## 228 **3 Results**

### 229 **3.1 Heterotrophic plate counts**

230 The number of heterotrophic bacterial colonies (heterotrophic plate count - HPC) varied  
231 greatly depending on water origin and across the tested growth conditions, with values  
232 ranging from 0 to over  $10^6$  CFU/ml. TWs and GWs showed significantly lower values in  
233 comparison to RWs and WWs (table 1). Only in TWs, HPC on YEA medium increased  
234 significantly passing from 3 to 7 days of incubation (Kruskal-Wallis test,  $p \ll 0.01$ ). After the  
235 longer incubation time, there was a statistically significant difference between colony  
236 numbers found on YEA and R2A and between all water groups (Kruskal-Wallis test,  $p <$   
237  $0.05$ ), though HPC from cTWs was close to the method detection limit in all growth  
238 conditions. HPC on R2A medium showed values higher than that on YEA medium.  
239 FDM thresholds were plotted in figure 1 and reported in table 2. Overall, we found significant  
240 differences between contamination levels of all water groups, assessed in terms of  
241 cultivability and tested by PERMANOVA ( $p \ll 0.001$ ).

242

### 243 **3.2 Alternative parameters to assess the water microbial load**

244 ATP concentrations varied over more than 6 log units, with a sharp increase from tap waters  
245 (range  $1.5 - 24.1 \times 10^{-3}$  pg ATP/ml) to waste waters (range  $1.9 - 59.0 \times 10^2$  pg ATP/ml) (figure  
246 2a). Apart from TWs and GWs which showed similar values (Kruskal-Wallis test,  $p > 0.05$ ),  
247 the differences in the mean ATP content among water groups were greater than would be  
248 expected by chance (Kruskal-Wallis test,  $p < 0.05$ ).

249 As assessed by qPCR, the abundance of 16S rDNA copies varied from  $2.2 \times 10^2$  copies/ml  
250 (with minimum values found in chlorinated tap waters) to  $9.8 \times 10^7$  copies/ml (with maximum  
251 values found in WWs) (figure 2b). GWs showed similar values to uTWs and RWs (Kruskal-  
252 Wallis,  $p > 0.10$ ), but there were statistically significant differences among all other water  
253 groups (Kruskal-Wallis,  $p < 0.05$ ).

254 As assessed by flow cytometry, TCC ranged over 3 log units, passing from  $1.2 \times 10^4$  cells/ml  
255 (minimum values in GWs) to  $2.9 \times 10^7$  cells/ml (maximum values in WWs) (figure 2c). WWs  
256 showed a different mean value from all other groups (Kruskal-Wallis test,  $p < 0.01$ ), while  
257 GWs did not show any statistical difference with cTWs and RWs (Kruskal-Wallis test,  $p >$   
258  $0.07$ ). Total cell counts double-checked by epifluorescence microscopy were similar and well  
259 correlated with FCM data points on the 1:1 log-log line (Spearman's  $r = 0.91$ ,  $p \ll 0.001$ ;  
260 data not shown). On average, the great majority of total cells comprised membrane-intact cells  
261 (ICC =  $84.1 \pm 10.3$  % of TCC), with percentages lower in tap waters ( $78.1 \pm 11.9$  %) and  
262 higher in ground waters ( $91.7 \pm 5.0$  %). Given the limited variation range, ICC followed  
263 patterns very similar to TCC on the log scale (figure 2d). FDM thresholds were plotted in  
264 figure 2 and reported in table 2. Overall, we found significant differences between the average  
265 contamination levels of all water groups, also using the combination of alternative parameters  
266 (i.e., ATP, 16S rDNA, ICC) (PERMANOVA,  $p < 0.01$ ).

267

### 268 **3.3 Data correlation and methodological cross-validation**

269 Over the monitored wide range of microbial contamination levels, positive linear correlations  
270 were observed between all parameters and methods applied in this study. HPC on R2A  
271 showed the best correlations with other parameters in comparison to HPC on YEA. The best  
272 fit was found in the log-log linear relation between ATP and HPC-R2A (Spearman's  $r = 0.91$ )  
273 and qPCR data (Spearman's  $r = 0.97$ ), while the weakest between ATP and FCM data  
274 (Spearman's  $r = 0.81$ ). HPC-R2A and ICC showed higher correlation coefficients than HPC-  
275 YEA and TCC, respectively. Thus, they were used in correlation plots against all other  
276 parameters (figure 3).

277 Warning and alarm thresholds, computed according to the FDM of each single parameter and  
278 the LRM correlations equations between all pairs of data (figure 3), were summarized in table  
279 2. The mean values ( $\pm$  standard deviation) of warning and alarm thresholds were proposed as  
280 alternative water quality standards based on the microbial load assessed by each independent  
281 parameter (table 2).

282

## 283 **4 Discussion**

### 284 **4.1 Suitability of warning and alarm thresholds of water microbial load for space** 285 **applications**

286 The appropriate consideration of microorganisms in human-confined habitats and their  
287 interactions with the space environment are essential to start designing a self-sufficient  
288 spacecraft for safe and successful future missions (Pierson, 2001). In extremely confined  
289 habitability conditions, as those found onboard crewed space-crafts and during longer-lasting  
290 flight missions, water renewal by ground-loaded supplies could be increasingly expensive and  
291 unmanageable for months (McCleskey et al., 2012). Therefore, water consumption needs and  
292 human health issues may fundamentally rely on a timely detection of unexpected  
293 microbiological contamination events, e.g. owing to failure of onboard water recycling and  
294 disinfection treatments. Here we presented a data-driven double-threshold procedure intended

295 to identify novel standards of water quality, using alternative cultivation-independent  
296 parameters suitable for (near) real-time assessments of the total microbial load.

297 In current water regulations on Earth, several procedures have been recommended to  
298 distinguish between elements of geogenic and anthropogenic origin, elucidate the spatial  
299 distribution of chemical elements, identify the source of pollution, and estimate the related  
300 risks for human health and activities. The detection of anomalies in the concentration of major  
301 and trace chemical elements is one of the main tasks in the adopted statistical approaches  
302 (Biddau et al., 2017; Reimann et al., 2005; Stefania et al., 2018). Probability plots, in  
303 combination with a data pre-selection, were proposed to graphically represent trends and  
304 discontinuities, also identifying data exceeding fixed percentile values (generally the 90<sup>th</sup>,  
305 95<sup>th</sup>, and 97.7<sup>th</sup> percentile outliers) (Preziosi et al., 2014). In this study, we followed a similar  
306 approach but using the microbial load data assessed by different methodologies in order to  
307 determine warning and alarm threshold values, respectively set on the 95<sup>th</sup> and 5<sup>th</sup> percentiles  
308 of values found in the water samples with low and high microbial load. By fundamentally  
309 relying on the number and distribution of the available data, the described procedure was not  
310 intended to provide fixed limits nor the risks associated with water microbial contamination  
311 events. The identified threshold values (table 2) could constitute novel reference values, in  
312 view of data deriving from real space conditions and human-confined environments. It is  
313 worth noting that two drinking water samples (i.e., Russian potable spring waters), analyzed  
314 after 5-years exposure to ISS microgravity conditions by using ATP-metry and flow  
315 cytometry with the same full methods herein described, exceeded the alarm thresholds (Bacci  
316 et al., 2018 - submitted). Thus, it is likely that some sort of water treatment should be  
317 considered to comply with our novel water quality standards.

318 The microbial load has been retained a key driver of microbial alterations due to varying  
319 environmental factors and water treatment settings in numerous studies focused on either  
320 natural or engineered aquatic systems (Amalfitano et al., 2018; Besmer and Hammes, 2016;

321 Harry et al., 2016; Osman et al., 2008). However, the application of alternative parameters  
322 into regulatory water quality monitoring is still prevented by methodological and procedural  
323 issues, including inter-laboratory reproducibility, prioritization of water contaminants, and  
324 cross-validation of applied methodologies (Chapman, 1996). In this study, all selected  
325 monitoring techniques showed pioneering potential applicability to space and human-confined  
326 environments, given the necessity to overcome some basic drawbacks of cultivation-based  
327 approaches (i.e., time-to-result up to several days from sampling; growth of opportunistic  
328 microorganisms from stored analytical wastes).

329

#### 330 **4.2 HPC acceptability levels in space waters**

331 For preflight and in-flight waters, HPC acceptability levels were developed through space  
332 analytical experience to mitigate risks to crew health and to maintain the integrity of water  
333 treatment systems (e.g., prevention of biofouling in water recirculation and distribution  
334 network; microbial growth on hardware components) (Pierson et al., 2013; Van Houdt et al.,  
335 2012). According to the ISS Medical Operations Requirements Document (Duncan et al.,  
336 2008), ISS waters must be free of coliforms, with a HPC values  $\leq 50$  CFU/ml, and sample  
337 processing and analysis have to follow precise procedural steps using the US Environmental  
338 Health System water kit (NASA, 2005).

339 When considering the cultivation conditions relatively more similar to those of the US water  
340 kit (i.e., HPC on YEA after 3 incubation days at 22°C), TWs and GWs samples accomplished  
341 the HPC limit of 50 CFU/ml, with warning and alarm thresholds respectively lower and  
342 higher of that established for space requirements. However, the HPC thresholds were  
343 considerably higher if estimated from other cultivation conditions (table 2). In drinking water  
344 legislation and guidelines, maximum HPC limits can vary from 20 CFU/ml to 500 CFU/ml  
345 depending on local regulations and sampling locations (Allen et al., 2004).

346 In line with recently reviewed data (Diduch et al., 2016), we found that HPC were influenced  
347 significantly by cultivation conditions (i.e., HPC-R2A > HPC-YEA), time of incubation (i.e.,  
348 HPC at 3 days < HPC at 7 days), and the initial microbial load level (figure 1). These results  
349 are critical when considering that the ISS is provided with four different supplied waters from  
350 the space agencies of USA (NASA), Europe (ESA), Russia (Roscosmos; Russian Federal  
351 Space Agency), and Japan (JAXA; Japanese Aerospace Exploration Agency). Water  
352 microbial communities (e.g., phylogenetic structure) and local treatment requirements (e.g.,  
353 addition of different concentration of chlorine, silver, or iodine as biocide agents) may differ  
354 considerably, so as HPC outcomes. Further differences in microbial cell cultivability under  
355 space conditions are likewise expected owing to microgravity and varying cosmic radiation  
356 levels, as it was found either for specific bacterial suspended cultures (Kacena et al., 1999) or  
357 for strains isolated from built environments on Earth and cultivated on the ISS (Coil et al.,  
358 2016). Experiments have been conducted to improve the speed and efficiency of microbial  
359 cultivation assays on the ISS using disposable simple devices and microfluidic systems (e.g.,  
360 [https://www.nasa.gov/mission\\_pages/station/research/experiments/1033.html](https://www.nasa.gov/mission_pages/station/research/experiments/1033.html);  
361 [https://www.nasa.gov/mission\\_pages/station/research/experiments/2357.html](https://www.nasa.gov/mission_pages/station/research/experiments/2357.html)). Major  
362 advantages arise from target-specific isolation and characterization of different types of  
363 microorganisms in pure cultures, including water-borne pathogens (Boitard et al., 2015).  
364 However, the HPC reliability for total microbial load assessments in space waters might fall  
365 far below the acceptable reproducibility levels, unless other cultivation-independent  
366 techniques are applied to provide confirmatory data, as also observed in terrestrial studies.

367

### 368 **4.3 ATP-metry and advanced automation options for space applications**

369 Based on a 20 years' experience on space microbial monitoring, ATP-metry has been retained  
370 a consistent approach for estimating the viable microbial biomass in water samples (Guarnieri  
371 et al., 1997; La Duc et al., 2004). By offering feasible automation options for space

372 applications, we found that ATP-metry allowed to consistently discriminate water types  
373 according to their constitutive microbial contamination levels, also showing a wider variation  
374 range in comparison to the other selected parameters (figure 2). The highest ratio between  
375 alarm and warning thresholds was also observed (table 2).

376 In drinking water and food industries, routine ATP measurements were added upon  
377 commercially available ATP assay kits and compared in-depth to standard cultivation-based  
378 outcomes (Bottari et al., 2015; Hammes et al., 2010; van der Wielen and van der Kooij,  
379 2010). One caveat is that community structure variations, with a natural succession of  
380 microbial cells with different ATP content (e.g., prokaryotic and eukaryotic cells), may be  
381 overlooked owing to the ataxonomic resolution of ATP assays. Therefore, the microbial load  
382 evaluations based on ATP-metry could be further strengthened by complimenting with  
383 specific cell-targeting parameters (e.g., biomolecular information, total cell counts, cell size  
384 measurements) (Siebel et al., 2008; Vang et al., 2014).

385

#### 386 **4.4 Space applicability of qPCR and biomolecular methods**

387 In space research, the successful application of biomolecular assays was found to rely on  
388 procedural improvements for extracting cell nucleic acids and selecting appropriate control  
389 samples (e.g., with the same amplification efficiency as the target sequence under  
390 microgravity conditions), along with instrumental developments (Yamaguchi et al., 2014).

391 In this study, the abundance of 16S rRNA gene copies was significantly different among  
392 water types, also showing significant correlations with values of total microbial load assessed  
393 by the other parameters (figures 2). The estimated threshold values allowed discriminating  
394 waters with low and high microbial load (table 2). Despite showing puzzling low values in  
395 TWs and GWs (on average  $0.39 \pm 0.07$  16S rDNA/cell), the 16S rDNA per-cell ratio was  
396 highly variable among water types and consistent with literature data (Klappenbach, 2001;  
397 Maturro et al., 2013). In view of recent technological developments of molecular methods for



398 space applications, we found that qPCR could be considered as a sensible method for water  
399 monitoring, although time-to-results can rise up to several hours from sampling (Lopez-  
400 Roldan et al., 2013). Advantages and limitations of the 16S rDNA targeting PCR procedures  
401 were reviewed extensively within the context of molecular techniques used to generate data  
402 for biomonitoring (Porter and Hajibabaei, 2018; Smith and Osborn, 2009). In particular, it  
403 was underlined that current protocols are definitely more informative when used to quantify  
404 the occurrence of target functional genes and species of interest (e.g., human pathogens and  
405 microorganisms of habitability concerns) rather than estimating the total microbial load  
406 (Smith and Osborn, 2009; Sohier et al., 2014).

407

#### 408 **4.5 Flow cytometry: a future alternative tool?**

409 Flow cytometry has been included in the roadmaps of space agencies for monitoring  
410 spaceflight-associated requirements (Crucian and Sams, 2005). Though it was not yet  
411 specifically tested for onboard water quality assessments, a customized FCM platform was  
412 already successfully tested on board the ISS to assess physiological adaptations of astronauts'  
413 blood cells to microgravity (Crucian and Sams, 2012; Dubeau-Laramée et al., 2014; Phipps et  
414 al., 2014). In multiple full-scale terrestrial applications, detailed reasons were recognized and  
415 meticulously described to argue that FCM could represent a suitable alternative for routine  
416 microbiological water monitoring (Van Nevel et al., 2017).

417 Our results were in line with published data in terms of both total and intact cell counts  
418 assessed from different water types including drinking waters (Vital et al., 2012), ground  
419 waters (Amalfitano et al., 2014), river waters (Boi et al., 2016), and wastewaters (Foladori et  
420 al., 2010). Evidences of significant cross-correlation among microbial quantification  
421 techniques are widely reported in literature (Siebel et al., 2008; Vital et al., 2012).

422 Accordingly, we found significant correlations between FCM data and results from

423 epifluorescence microscopy, along with the water microbial load assessed by HPC, ATP-  
424 metry, and qPCR (figure 3).  
425 However, unexpected low TCC values particularly in some RWs and WWs could originate  
426 from the presence of suspended cell aggregates (i.e., verified by microscopic direct  
427 observations), which are acquired as single events (Casentini et al., 2016; Liu et al., 2016).  
428 Moreover, the cytometric evaluations are susceptible to increased background levels and  
429 debris found in very clean waters (Hammes et al., 2008), with possible TCC over-estimations  
430 in TWs. This could partly explain why TCC showed the lower data variation (i.e., 3 log units)  
431 in comparison to the other parameters among water types with such different origin and  
432 contamination levels. Accordingly, the alarm threshold was only three times higher than the  
433 warning threshold. Therefore, FCM routine analysis and developed protocols still require a  
434 thorough calibration and validation of their performances and drawbacks for space  
435 applications.

436

## 437 **5 Conclusions**

438 Our results allowed identifying alternative standards of water quality based on the assessment  
439 of the water microbial load, thus providing a backbone dataset to develop and test innovative  
440 monitoring approaches for space and Earth-based water settings. Cultivation-independent  
441 techniques, selected among those consolidated in terrestrial studies and with current or  
442 promising perspectives for space applications (i.e., HPC, ATP-metry, qPCR, flow cytometry),  
443 could help in managing the ISS on-board water quality, and ultimately enhance the crew  
444 responsiveness by providing an immediate alert of microbial load peaks.

445

## 446 *Acknowledgments*

447 This work was supported by the European project BIOWYSE (H2020-COMPET-2015-  
448 687447).

449 **References**

450 Allen, C.S., Giraudo, M., Moratto, C., Yamaguchi, N., 2018. Spaceflight environment, in:  
451 Space Safety and Human Performance. Elsevier, pp. 87–138. doi:10.1016/B978-0-08-  
452 101869-9.00004-2

453 Allen, M.J., Edberg, S.C., Reasoner, D.J., 2004. Heterotrophic plate count bacteria — what is  
454 their significance in drinking water? Int. J. Food Microbiol. 92, 265–274.

455 doi:10.1016/j.ijfoodmicro.2003.08.017

456 Amalfitano, S., Del Bon, A., Zoppini, A., Ghergo, S., Fazi, S., Parrone, D., Casella, P., Stano,  
457 F., Preziosi, E., 2014. Groundwater geochemistry and microbial community structure in  
458 the aquifer transition from volcanic to alluvial areas. Water Res. 65, 384–394.

459 doi:10.1016/j.watres.2014.08.004

460 Amalfitano, S., Fazi, S., Ejarque, E., Freixa, A., Romaní, A.M., Butturini, A., 2018.

461 Deconvolution model to resolve cytometric microbial community patterns in flowing  
462 waters. Cytom. Part A 93, 194–200. doi:10.1002/cyto.a.23304

463 APHA, 2005. Standard Methods for the Examination of Water and Wastewater. Stand.

464 methods Exam. water wastewater 541. doi:ISBN 9780875532356

465 Bacci, G., Amalfitano, S., Levantesi, C., Rossetti, S., Garrelly, L., Canganella, F., Bianconi,  
466 G., The Biowyse Consortium, Di Pilato, V., Rossolini, G.M., Mengoni, M., Fani, R.,

467 Perrin, E., 2018. Drink in space: effects of microgravity and silver treatments on water  
468 preservation. Submitted.

469 Besmer, M.D., Hammes, F., 2016. Short-term microbial dynamics in a drinking water plant  
470 treating groundwater with occasional high microbial loads. Water Res. 107, 11–18.

471 doi:10.1016/j.watres.2016.10.041

472 Biddau, R., Cidu, R., Lorrai, M., Mulas, M.G., 2017. Assessing background values of

473 chloride, sulfate and fluoride in groundwater: A geochemical-statistical approach at a

474 regional scale. J. Geochemical Explor. 181, 243–255. doi:10.1016/j.gexplo.2017.08.002

- 475 Boguraev, A.-S., Christensen, H.C., Bonneau, A.R., Pezza, J.A., Nichols, N.M., Giraldez,  
476 A.J., Gray, M.M., Wagner, B.M., Aken, J.T., Foley, K.D., Copeland, D.S., Kraves, S.,  
477 Alvarez Saavedra, E., 2017. Successful amplification of DNA aboard the International  
478 Space Station. *npj Microgravity* 3, 26. doi:10.1038/s41526-017-0033-9
- 479 Boi, P., Amalfitano, S., Manti, A., Semprucci, F., Sisti, D., Rocchi, M.B., Balsamo, M., Papa,  
480 S., 2016. Strategies for Water Quality Assessment: A Multiparametric Analysis of  
481 Microbiological Changes in River Waters. *River Res. Appl.* 32, 490–500.  
482 doi:10.1002/rra.2872
- 483 Boitard, L., Cottinet, D., Bremond, N., Baudry, J., Bibette, J., 2015. Growing microbes in  
484 millifluidic droplets. *Eng. Life Sci.* 15, 318–326. doi:10.1002/elsc.201400089
- 485 Bottari, B., Santarelli, M., Neviani, E., 2015. Determination of microbial load for different  
486 beverages and foodstuff by assessment of intracellular ATP. *Trends Food Sci. Technol.*  
487 44, 36–48. doi:<https://doi.org/10.1016/j.tifs.2015.02.012>
- 488 Casentini, B., Falcione, F.T., Amalfitano, S., Fazi, S., Rossetti, S., 2016. Arsenic removal by  
489 discontinuous ZVI two steps system for drinking water production at household scale.  
490 *Water Res.* 106, 135–145. doi:10.1016/j.watres.2016.09.057
- 491 Castro, V.A., Thrasher, A.N., Healy, M., Ott, C.M., Pierson, D.L., 2004. Microbial  
492 Characterization during the Early Habitation of the International Space Station. *Microb.*  
493 *Ecol.* 47, 119–126. doi:10.1007/s00248-003-1030-y
- 494 Chapman, D. V, 1996. *Water quality assessments: a guide to the use of biota, sediments, and*  
495 *water in environmental monitoring*, Second Edi. ed. E & Fn Spon London, London.
- 496 Coil, D.A., Neches, R.Y., Lang, J.M., Brown, W.E., Severance, M., Cavalier, D.D., Eisen,  
497 J.A., 2016. Growth of 48 built environment bacterial isolates on board the International  
498 Space Station (ISS). *PeerJ* 4, 1–11. doi:10.7287/peerj.preprints.1654v1
- 499 Colwell, R.R., 2009. Viable but Not Cultivable Bacteria, in: Epstein, S.S. (Ed.), *Uncultivated*  
500 *Microorganisms*. Springer Berlin Heidelberg, Berlin, Heidelberg, pp. 121–129.

- 501       doi:10.1007/978-3-540-85465-4\_1
- 502       Crucian, B., Sams, C., 2012. Flow cytometry methods to monitor immune dysregulation  
503       associated with spaceflight, *Stress Challenges and Immunity in Space: From*  
504       *Mechanisms to Monitoring and Preventive Strategies*. Springer Berlin Heidelberg,  
505       Berlin, Heidelberg. doi:10.1007/978-3-642-22272-6
- 506       Crucian, B., Sams, C., 2005. Reduced Gravity Evaluation of Potential Spaceflight-Compatible  
507       Flow Cytometer Technology. *Cytom. Part B* 9, 1–9. doi:10.1002/cyto.b.20057
- 508       Czekalski, N., Berthold, T., Caucci, S., Egli, A., Bürgmann, H., 2012. Increased levels of  
509       multiresistant bacteria and resistance genes after wastewater treatment and their  
510       dissemination into Lake Geneva, Switzerland. *Front. Microbiol.* 3.  
511       doi:10.3389/fmicb.2012.00106
- 512       Di Cesare, A., Eckert, E.M., Teruggi, A., Fontaneto, D., Bertoni, R., Callieri, C., Corno, G.,  
513       2015. Constitutive presence of antibiotic resistance genes within the bacterial community  
514       of a large subalpine lake. *Mol. Ecol.* 24, 3888–3900.
- 515       Diduch, M., Polkowska, Z., Namieśnik, J., 2016. The role of heterotrophic plate count  
516       bacteria in bottled water quality assessment. *Food Control* 61, 188–195.  
517       doi:10.1016/j.foodcont.2015.09.024
- 518       Dubeau-Laramée, G., Rivière, C., Jean, I., Mermut, O., Cohen, L.Y., 2014. Microflow1, a  
519       sheathless fiber-optic flow cytometry biomedical platform: Demonstration onboard the  
520       international space station. *Cytom. Part A* 85, 322–331. doi:10.1002/cyto.a.22427
- 521       Duncan, J.M., Bogomolov, V. V, Castrucci, F., Koike, Y., Comtois, J.M., Sargsyan, A.E.,  
522       2008. Organization and management of the International Space Station (ISS) multilateral  
523       medical operations. *Acta Astronaut.* 63, 1137–1147.  
524       doi:<https://doi.org/10.1016/j.actaastro.2007.12.001>
- 525       European Union, 1998. 98/83/EC on the quality of water intended for human consumption.  
526       Adopt. by Counc. 3, 32–54.

- 527 Foladori, P., Bruni, L., Tamburini, S., Ziglio, G., 2010. Direct quantification of bacterial  
528 biomass in influent, effluent and activated sludge of wastewater treatment plants by  
529 using flow cytometry. *Water Res.* 44, 3807–3818. doi:10.1016/j.watres.2010.04.027
- 530 Gasol, J.M., Morán, X.A.G., 2015. Flow Cytometric Determination of Microbial Abundances  
531 and Its Use to Obtain Indices of Community Structure and Relative Activity, in:  
532 McGenity, T.J., Timmis, K.N., Nogales, B. (Eds.), *Hydrocarbon and Lipid Microbiology*  
533 *Protocols: Single-Cell and Single-Molecule Methods*. Springer Berlin Heidelberg,  
534 Berlin, Heidelberg, pp. 159–187. doi:10.1007/8623\_2015\_139
- 535 Grégori, G., Denis, M., Sgorbati, S., Citterio, S., 2018. Resolution of Viable and Membrane-  
536 Compromised Free Bacteria in Aquatic Environments by Flow Cytometry. *Curr. Protoc.*  
537 *Cytom.* 85, e42. doi:10.1002/cpcy.42
- 538 Guarnieri, V., Gaia, E., Battocchio, L., Pitzurra, M., Savino, A., Pasquarella, C., Vago, T.,  
539 Cotronei, V., 1997. New methods for microbial contamination monitoring: An  
540 experiment on board the mir orbital station. *Acta Astronaut.* 40, 195–201.  
541 doi:[https://doi.org/10.1016/S0094-5765\(97\)00102-1](https://doi.org/10.1016/S0094-5765(97)00102-1)
- 542 Hammer, Ø., Harper, D.A.T. a. T., Ryan, P.D., 2001. PAST: Paleontological Statistics  
543 Software Package for Education and Data Analysis. *Palaeontol. Electron.* 4(1), 1–9.  
544 doi:10.1016/j.bcp.2008.05.025
- 545 Hammes, F., Berney, M., Wang, Y., Vital, M., Köster, O., Egli, T., 2008. Flow-cytometric  
546 total bacterial cell counts as a descriptive microbiological parameter for drinking water  
547 treatment processes. *Water Res.* 42, 269–277. doi:10.1016/j.watres.2007.07.009
- 548 Hammes, F., Goldschmidt, F., Vital, M., Wang, Y., Egli, T., 2010. Measurement and  
549 interpretation of microbial adenosine tri-phosphate ( ATP ) in aquatic environments.  
550 *Water Res.* 44, 3915–3923. doi:10.1016/j.watres.2010.04.015
- 551 Harry, I.S.K., Ameh, E., Coulon, F., Nocker, A., 2016. Impact of Treated Sewage Effluent on  
552 the Microbiology of a Small Brook Using Flow Cytometry as a Diagnostic Tool. *Water.*

- 553 Air. Soil Pollut. 227. doi:10.1007/s11270-015-2723-9
- 554 Horneck, G., Klaus, D.M., Mancinelli, R.L., 2010. Space Microbiology. *Microbiol. Mol. Biol.*  
555 *Rev.* 74, 121–156. doi:10.1128/MMBR.00016-09
- 556 Huang, B., Li, D.-G., Huang, Y., Liu, C.-T., 2018. Effects of spaceflight and simulated  
557 microgravity on microbial growth and secondary metabolism. *Mil. Med. Res.* 5, 18.  
558 doi:10.1186/s40779-018-0162-9
- 559 ISO6222, 1999. Water Quality: Enumeration of Culturable Micro-organisms: Colony Count  
560 by Inoculation in a Nutrient Agar Culture Medium. International Organization for  
561 Standardization.
- 562 Kacena, M.A., Merrell, G.A., Manfredi, B., Smith, E.E., Klaus, D.M., Todd, P., 1999.  
563 Bacterial growth in space flight: logistic growth curve parameters for *Escherichia coli*  
564 and *Bacillus subtilis*. *Appl. Microbiol. Biotechnol.* 51, 229–234.  
565 doi:10.1007/s002530051386
- 566 Karouia, F., Peyvan, K., Pohorille, A., 2017. Toward biotechnology in space: High-  
567 throughput instruments for in situ biological research beyond Earth. *Biotechnol. Adv.* 35,  
568 905–932. doi:<https://doi.org/10.1016/j.biotechadv.2017.04.003>
- 569 Klappenbach, J.A., 2001. rrndb: the Ribosomal RNA Operon Copy Number Database.  
570 *Nucleic Acids Res.* 29, 181–184. doi:10.1093/nar/29.1.181
- 571 La Duc, M.T., Kern, R., Venkateswaran, K., 2004. Microbial monitoring of spacecraft and  
572 associated environments. *Microb. Ecol.* 47, 150–158.
- 573 Liu, G., Ling, F.Q., van der Mark, E.J., Zhang, X.D., Knezev, A., Verberk, J.Q.J.C., van der  
574 Meer, W.G.J., Medema, G.J., Liu, W.T., van Dijk, J.C., 2016. Comparison of particle-  
575 associated bacteria from a drinking water treatment plant and distribution reservoirs with  
576 different water sources. *Sci. Rep.* 6, 20367. doi:10.1038/srep20367
- 577 Lopez-Roldan, R., Tusell, P., Cortina, J.L., Courtois, S., Cortina, J.L., 2013. On-line  
578 bacteriological detection in water. *TrAC Trends Anal. Chem.* 44, 46–57.

- 579        doi:<https://doi.org/10.1016/j.trac.2012.10.010>
- 580    Matturro, B., Heavner, G.L., Richardson, R.E., Rossetti, S., 2013. Quantitative estimation of  
581        Dehalococcoides mccartyi at laboratory and field scale: Comparative study between  
582        CARD-FISH and Real Time PCR. *J. Microbiol. Methods* 93, 127–133.  
583        doi:[10.1016/j.mimet.2013.02.011](https://doi.org/10.1016/j.mimet.2013.02.011)
- 584    McCleskey, C., Rhodes, R., Lepsch, R., Henderson, E., Robinson, J., 2012. Approach to an  
585        Affordable and Productive Space Transportation System, in: 48th  
586        AIAA/ASME/SAE/ASEE Joint Propulsion Conference & Exhibit, Joint Propulsion  
587        Conferences. American Institute of Aeronautics and Astronautics.  
588        doi:[doi:10.2514/6.2012-4153](https://doi.org/10.2514/6.2012-4153)
- 589    Moissl-eichinger, C., Cockell, C., Rettberg, P., 2016. Venturing into new realms □?  
590        Microorganisms in space INTERNATIONAL SPACE STATION. *FEMS Microbiol.*  
591        *Rev.* 40, 722–737. doi:[10.1093/femsre/fuw015](https://doi.org/10.1093/femsre/fuw015)
- 592    NASA, 2005. Microbial Analysis of ISS Water Using the Water Microbiology Kit (WMK)  
593        and the Microbiology Water Analysis Kit. NASA, Houston.
- 594    Osman, S., Duc, M.T. La, Dekas, A., Newcombe, D., 2008. Microbial burden and diversity of  
595        commercial airline cabin air during short and long durations of travel. *ISME J.* 2, 482–  
596        497. doi:[10.1038/ismej.2008.11](https://doi.org/10.1038/ismej.2008.11)
- 597    Parra, M., Jung, J., Boone, T.D., Tran, L., Blaber, E.A., Brown, M., Chin, M., Chinn, T.,  
598        Cohen, J., Doebler, R., Hoang, D., Hyde, E., Lera, M., Luzod, L.T., Mallinson, M.,  
599        Marcu, O., Mohamedaly, Y., Ricco, A.J., Rubins, K., Sgarlato, G.D., Talavera, R.O.,  
600        Tong, P., Uribe, E., Williams, J., Wu, D., Yousuf, R., Richey, C.S., Schonfeld, J.,  
601        Almeida, E.A.C., 2017. Microgravity validation of a novel system for RNA isolation and  
602        multiplex quantitative real time PCR analysis of gene expression on the International  
603        Space Station. *PLoS One* 12. doi:[10.1371/journal.pone.0183480](https://doi.org/10.1371/journal.pone.0183480)
- 604    Phipps, W.S., Yin, Z., Bae, C., Sharpe, J.Z., Bishara, A.M., Nelson, E.S., Weaver, A.S.,



- 605 Brown, D., McKay, T.L., Griffin, D., Chan, E.Y., 2014. Reduced-gravity Environment  
606 Hardware Demonstrations of a Prototype Miniaturized Flow Cytometer and Companion  
607 Microfluidic Mixing Technology. *J. Vis. Exp.* 51743. doi:10.3791/51743
- 608 Pierson, D.L., 2001. Microbial contamination of spacecraft. *Gravit. Space Biol. Bull.* 14, 1–6.
- 609 Pierson, D.L., Botkin, D.J., Bruce, R.J., Castro, V.A., Smith, M.J., Oubre, C.M., Ott, C.M.,  
610 2013. Microbial monitoring of the international space station, in: Moldenhauer, J. (Ed.),  
611 Environmental Monitoring: A Comprehensive Handbook. DHI Publishing, River Grove,  
612 pp. 1–27.
- 613 Porter, K.G., Feig, Y.S., 1980. The use of DAPI for identifying and counting aquatic  
614 microflora. *Limnol. Oceanogr.* 25, 943–948.
- 615 Porter, T.M., Hajibabaei, M., 2018. Scaling up: A guide to high-throughput genomic  
616 approaches for biodiversity analysis. *Mol. Ecol.* 27, 313–338. doi:10.1111/mec.14478
- 617 Preziosi, E., Parrone, D., Bon, A. Del, Ghergo, S., 2014. Natural background level assessment  
618 in groundwaters □: probability plot versus pre-selection method. *J. Geochemical Explor.*  
619 doi:10.1016/j.gexplo.2014.03.015
- 620 Reimann, C., Filzmoser, P., Garrett, R.G., 2005. Background and threshold: critical  
621 comparison of methods of determination. *Sci. Total Environ.* 346, 1–16.  
622 doi:10.1016/j.scitotenv.2004.11.023
- 623 Robinson, J.P., Roederer, M., 2015. Flow cytometry strikes gold. *Science* (80-. ). 350, 739–  
624 740. doi:10.1126/science.aad6770
- 625 Siebel, E., Wang, Y., Egli, T., Hammes, F., 2008. Correlations between total cell  
626 concentration, total adenosine tri-phosphate concentration and heterotrophic plate counts  
627 during microbial monitoring of drinking water. *Drink. Water Eng. Sci. Discuss.* 1, 71–  
628 86. doi:10.5194/dwesd-1-71-2008
- 629 Smith, C.J., Osborn, A.M., 2009. Advantages and limitations of quantitative PCR ( Q-PCR ) -  
630 based approaches in microbial ecology. *FEMS Microbiol. Ecol.* 67, 6–20.

- 631           doi:10.1111/j.1574-6941.2008.00629.x
- 632   Sohier, D., Pavan, S., Riou, A., Combrisson, J., Postollec, F., 2014. Evolution of  
633           microbiological analytical methods for dairy industry needs. *Front. Microbiol.*
- 634   Stefania, G.A., Zanotti, C., Bonomi, T., Fumagalli, L., Rotiroti, M., 2018. Determination of  
635           trigger levels for groundwater quality in landfills located in historically human-impacted  
636           areas. *Waste Manag.* 75, 400–406. doi:10.1016/j.wasman.2018.01.043
- 637   USEPA, 2002. Calculating upper confidence limits for exposure point concentrations at  
638           hazardous waste sites, OSWER 9285.6-10.
- 639   van der Wielen, P., van der Kooij, D., 2010. Effect of water composition , distance and season  
640           on the adenosine triphosphate concentration in unchlorinated drinking water in the  
641           Netherlands. *Water Res.* 44, 4860–4867. doi:10.1016/j.watres.2010.07.016
- 642   Van Houdt, R., Mijndonckx, K., Leys, N., 2012. Microbial contamination monitoring and  
643           control during human space missions. *Planet. Space Sci.* 60, 115–120.  
644           doi:10.1016/j.pss.2011.09.001
- 645   Van Nevel, S., Koetsch, S., Proctor, C.R., Besmer, M.D., Prest, E.I., Vrouwenfelder, J.S.,  
646           Knezev, A., Boon, N., Hammes, F., 2017. Flow cytometric bacterial cell counts  
647           challenge conventional heterotrophic plate counts for routine microbiological drinking  
648           water monitoring. *Water Res.* 113, 191–206.
- 649   Vang, Ó.K., Corfitzen, C.B., Smith, C., Albrechtsen, H.-J., 2014. Evaluation of ATP  
650           measurements to detect microbial ingress by wastewater and surface water in drinking  
651           water. *Water Res.* 64, 309–320. doi:https://doi.org/10.1016/j.watres.2014.07.015
- 652   Vital, M., Dignum, M., Magic-knezev, A., Ross, P., Rietveld, L., Hammes, F., 2012. Flow  
653           cytometry and adenosine tri-phosphate analysis □: Alternative possibilities to evaluate  
654           major bacteriological changes in drinking water treatment and distribution systems.  
655           *Water Res.* 46, 4665–4676. doi:10.1016/j.watres.2012.06.010
- 656   Wand, M.P., 1997. Data-Based Choice of Histogram Bin Width. *Am. Stat.* 51, 59–64.

657           doi:10.1080/00031305.1997.10473591

658   Wang, Y., Hammes, F., De Roy, K., Verstraete, W., Boon, N., 2010. Past, present and future

659           applications of flow cytometry in aquatic microbiology. *Trends Biotechnol.* 28, 416–424.

660           doi:10.1016/j.tibtech.2010.04.006

661   Yamaguchi, N., Roberts, M., Castro, S., Oubre, C., Makimura, K., Leys, N., Grohmann, E.,

662           Sugita, T., Ichijo, T., Nasu, M., 2014. Microbial Monitoring of Crewed Habitats in

663           Space—Current Status and Future Perspectives. *Microbes Environ.* 29, 250–260.

664           doi:10.1264/jsme2.ME14031

665

666 **Table 1.** Complete dataset of the water microbial load. Heterotrophic Plate Counts (HPC)  
 667 were assessed from different cultivation media (i.e., YEA, R2A) and incubation times (i.e., 3  
 668 and 7 days). Cultivation-independent techniques with current and promising perspectives for  
 669 space applications were selected (i.e., ATP-metry, qPCR, flow cytometry - FCM). Samples  
 670 included chlorinated Tap Waters (cTW1-7), unchlorinated Tap Waters (uTW1-7), Ground  
 671 Waters (GW1-7), Rivers Waters (RW1-7), and Waste Waters (WW1-7).  
 672

|             | Cultivation based techniques |                      |                      | Cultivation independent techniques |                         |                       |                        |
|-------------|------------------------------|----------------------|----------------------|------------------------------------|-------------------------|-----------------------|------------------------|
|             | HPC YEA-3d<br>CFU/ml         | HPC YEA-7d<br>CFU/ml | HPC R2A-7d<br>CFU/ml | ATP-metry<br>pg/ml                 | qPCR 16S<br>rDNA copies | FCM Total<br>cells/ml | FCM Intact<br>cells/ml |
| <b>cTW1</b> | 1.00E+00                     | 2.00E+00             | 4.00E+00             | 1.48E-03                           | 4.21E+02                | 2.55E+04              | 2.23E+04               |
| <b>cTW2</b> | 1.00E+00                     | 1.80E+01             | 2.80E+01             | 2.41E-02                           | 1.46E+03                | 4.65E+04              | 2.93E+04               |
| <b>cTW3</b> | 1.00E+00                     | 1.00E+00             | 4.00E+00             | 2.44E-03                           | 2.23E+02                | 2.14E+04              | 1.92E+04               |
| <b>cTW4</b> | 1.00E+00                     | 0.00E+00             | 1.00E+00             | 8.02E-03                           | 3.70E+02                | 1.50E+04              | 1.30E+04               |
| <b>cTW5</b> | 0.00E+00                     | 0.00E+00             | 3.00E+00             | 3.89E-03                           | 5.00E+03                | 5.71E+04              | 5.10E+04               |
| <b>cTW6</b> | 1.00E+00                     | 4.00E+00             | 1.20E+01             | 3.13E-03                           | 2.68E+02                | 1.57E+04              | 1.52E+04               |
| <b>cTW7</b> | 1.00E+00                     | 3.00E+00             | 5.00E+00             | 2.46E-03                           | 3.70E+02                | 1.79E+04              | 1.55E+04               |
| <b>uTW1</b> | 0.00E+00                     | 1.25E+02             | 4.00E+02             | 1.95E+00                           | 1.36E+04                | 1.12E+05              | 8.84E+04               |
| <b>uTW2</b> | 2.00E+00                     | 4.90E+01             | 3.00E+02             | 2.11E+00                           | 1.54E+04                | 1.18E+05              | 8.49E+04               |
| <b>uTW3</b> | 0.00E+00                     | 1.83E+02             | 1.20E+03             | 2.75E+00                           | 1.76E+04                | 1.45E+05              | 1.03E+05               |
| <b>uTW4</b> | 1.00E+00                     | 3.00E+02             | 3.00E+02             | 2.09E+00                           | 1.87E+04                | 1.28E+05              | 1.02E+05               |
| <b>uTW5</b> | 1.00E+00                     | 3.00E+02             | 3.00E+02             | 1.55E+00                           | 9.39E+03                | 1.19E+05              | 6.93E+04               |
| <b>uTW6</b> | 0.00E+00                     | 2.30E+01             | 5.40E+02             | 1.41E+00                           | 8.85E+03                | 1.25E+05              | 8.94E+04               |
| <b>uTW7</b> | 0.00E+00                     | 1.20E+01             | 3.00E+02             | 1.57E+00                           | 1.05E+04                | 1.30E+05              | 8.11E+04               |
| <b>GW1</b>  | 1.00E+00                     | 1.00E+00             | 3.00E+02             | 2.18E-01                           | 8.64E+03                | 4.61E+04              | 4.37E+04               |
| <b>GW2</b>  | 0.00E+00                     | 2.00E+00             | 2.00E+02             | 1.67E-01                           | 1.14E+04                | 2.92E+04              | 2.78E+04               |
| <b>GW3</b>  | 0.00E+00                     | 0.00E+00             | 2.00E+02             | 7.65E-01                           | 1.89E+04                | 6.39E+04              | 6.17E+04               |
| <b>GW4</b>  | 7.00E+00                     | 1.00E+01             | 2.00E+01             | 1.95E-01                           | 5.69E+03                | 2.48E+04              | 2.37E+04               |
| <b>GW5</b>  | 0.00E+00                     | 1.00E+00             | 6.00E+00             | 1.48E+00                           | 1.18E+04                | 1.41E+04              | 1.28E+04               |
| <b>GW6</b>  | 0.00E+00                     | 0.00E+00             | 1.20E+01             | 2.00E+00                           | 1.71E+04                | 1.19E+04              | 1.01E+04               |
| <b>GW7</b>  | 0.00E+00                     | 0.00E+00             | 7.30E+01             | 1.43E+01                           | 8.88E+04                | 3.42E+04              | 2.92E+04               |
| <b>RW1</b>  | 8.30E+01                     | 1.53E+02             | 7.00E+02             | 3.41E+00                           | 3.34E+04                | 3.43E+04              | 2.73E+04               |
| <b>RW2</b>  | 7.20E+02                     | 8.50E+02             | 6.50E+03             | 2.92E+01                           | 1.39E+05                | 1.44E+05              | 1.26E+05               |
| <b>RW3</b>  | 4.50E+01                     | 4.90E+01             | 3.00E+02             | 8.66E-01                           | 8.67E+03                | 2.09E+04              | 1.93E+04               |
| <b>RW4</b>  | 4.90E+02                     | 6.20E+02             | 1.00E+04             | 3.60E+02                           | 1.50E+06                | 1.42E+06              | 1.01E+06               |
| <b>RW5</b>  | 1.88E+03                     | 1.96E+03             | 2.94E+03             | 3.96E+00                           | 2.21E+04                | 3.23E+04              | 2.92E+04               |
| <b>RW6</b>  | 5.00E+02                     | 5.90E+02             | 1.20E+04             | 1.58E+02                           | 7.49E+05                | 4.32E+05              | 3.84E+05               |
| <b>RW7</b>  | 1.33E+03                     | 1.51E+03             | 1.00E+04             | 5.60E+01                           | 7.99E+05                | 5.98E+05              | 4.62E+05               |
| <b>WW1</b>  | 1.00E+02                     | 3.00E+02             | 3.00E+04             | 1.94E+02                           | 2.72E+06                | 2.07E+06              | 1.86E+06               |
| <b>WW2</b>  | 3.00E+04                     | 3.00E+04             | 3.00E+06             | 5.90E+03                           | 9.81E+07                | 2.92E+07              | 2.56E+07               |
| <b>WW3</b>  | 3.10E+03                     | 4.70E+03             | 4.00E+04             | 2.80E+02                           | 6.89E+06                | 6.62E+06              | 5.63E+06               |
| <b>WW4</b>  | 1.92E+04                     | 3.00E+04             | 5.00E+04             | 2.77E+03                           | 7.23E+07                | 1.04E+06              | 9.31E+05               |
| <b>WW5</b>  | 3.00E+04                     | 3.00E+04             | 3.00E+06             | 2.72E+03                           | 9.15E+06                | 1.51E+07              | 1.20E+07               |
| <b>WW6</b>  | 1.00E+02                     | 2.00E+02             | 1.00E+04             | 2.09E+02                           | 2.33E+06                | 1.32E+06              | 1.28E+06               |
| <b>WW7</b>  | 4.50E+03                     | 7.90E+03             | 2.00E+04             | 3.55E+02                           | 3.78E+06                | 2.85E+06              | 2.67E+06               |

673

674 **Table 2.** Warning and alarm thresholds, computed according to the frequency distribution  
 675 model (FDM) of each single parameter (see also figure 1 and 2) and the correlation equations  
 676 of Linear Regression Model (LRM) between pairs of parameters (see also figure 4). Mean  
 677 values ( $\pm$  standard deviation) of both thresholds were reported per each parameter and  
 678 retained as alternative water quality standards.  
 679

| <b>Model</b> | <b>Parameter</b>             | <b>Warning threshold</b> | <b>Alarm Threshold</b> |
|--------------|------------------------------|--------------------------|------------------------|
| FDM          | HPC-YEA3d (CFU/ml)           | 41                       | 100                    |
| FDM          | HPC-YEA7d (CFU/ml)           | 126                      | 195                    |
| FDM          | HPC-R2A7d (CFU/ml)           | 684                      | 4898                   |
| LRM          | HPC vs ATP                   | 557                      | 1604                   |
| LRM          | HPC vs qPCR                  | 381                      | 4980                   |
| LRM          | HPC vs FCM                   | 428                      | 4145                   |
|              | Mean $\pm$ sd                | 512 $\pm$ 137            | 3907 $\pm$ 1580        |
| FDM          | ATP (pg/ml)                  | 2.7                      | 10.2                   |
| LRM          | ATP vs HPC                   | 3.3                      | 26.1                   |
| LRM          | ATP vs qPCR                  | 1.7                      | 37.9                   |
| LRM          | ATP vs FCM                   | 2.0                      | 22.2                   |
|              | Mean $\pm$ sd                | 2.4 $\pm$ 0.7            | 24.1 $\pm$ 11.5        |
| FDM          | 16S rDNA ( $10^4$ copies/ml) | 3.2                      | 44.4                   |
| LRM          | 16S vs HPC                   | 5.5                      | 29.4                   |
| LRM          | 16S vs ATP                   | 4.7                      | 13.2                   |
| LRM          | 16S vs FCM                   | 3.6                      | 29.9                   |
|              | Mean $\pm$ sd                | 4.2 $\pm$ 1.0            | 29.2 $\pm$ 12.8        |
| FDM          | ICC ( $10^5$ cells/ml)       | 1.0                      | 4.2                    |
| LRM          | ICC vs HPC                   | 1.3                      | 3.6                    |
| LRM          | ICC vs ATP                   | 1.2                      | 2.1                    |
| LRM          | ICC vs qPCR                  | 1.0                      | 4.1                    |
|              | Mean $\pm$ sd                | 1.1 $\pm$ 0.2            | 3.5 $\pm$ 1.0          |

680

681

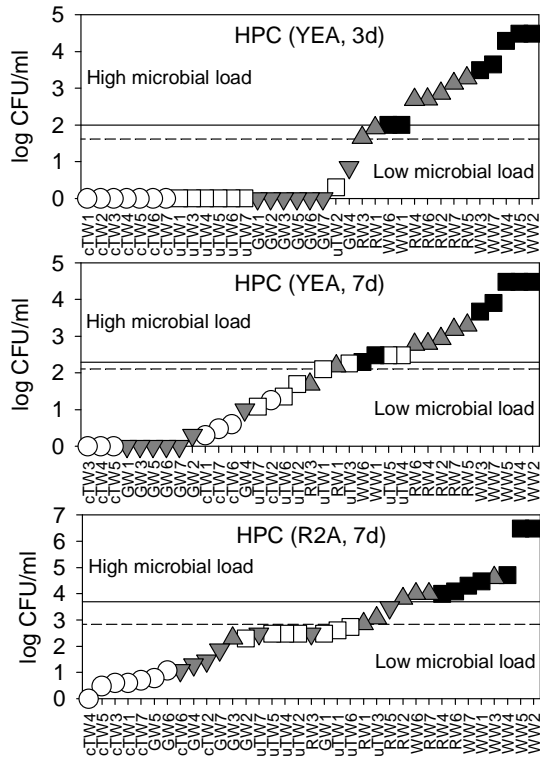

682

683 **Figure 1.** Water microbial load as assessed by plate cultivation on Yeast Agar extract (YEA)  
684 and R2A medium, upon 3 days and 7 days of incubation. HPC data were plotted in ascending  
685 rank order on a logarithmic scale in order to better visualize warning (dashed lines) and alarm  
686 (solid lines) thresholds, which discriminate waters with low and high microbial load. Samples  
687 included chlorinated Tap Waters (cTW1-7), unchlorinated Tap Waters (uTW1-7), Ground  
688 Waters (GW1-7), Rivers Waters (RW1-7), and Waste Waters (WW1-7).

689

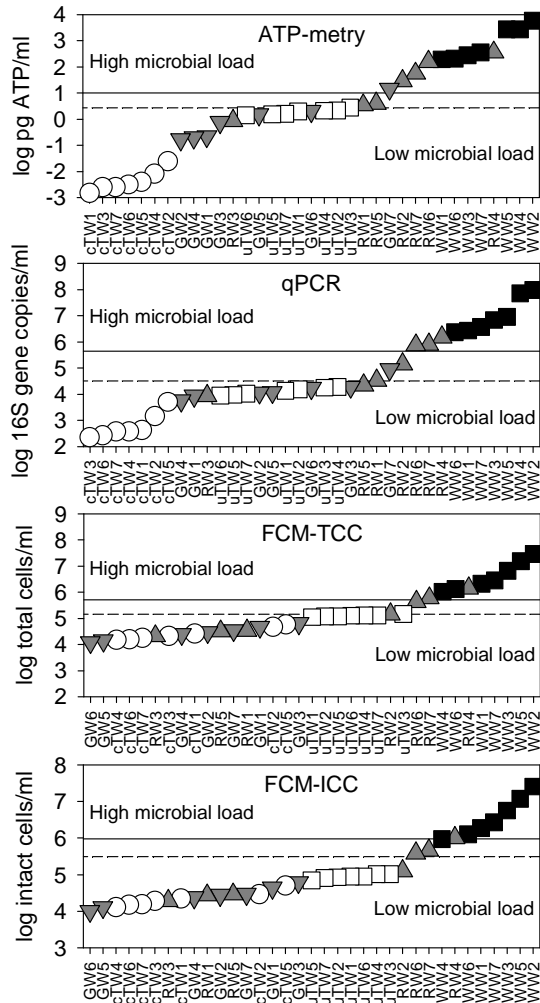

690

691 **Figure 2.** Water microbial load as assessed by alternative parameters (i.e., ATP content, 16S  
692 rRNA gene abundance, total cell counts - TCC, intact cell counts - ICC). All data were plotted  
693 in ascending rank order on a logarithmic scale in order to better visualize warning (dashed  
694 lines) and alarm (solid lines) thresholds, which discriminate waters with low and high  
695 microbial load. Samples included chlorinated Tap Waters (cTW1-7), unchlorinated Tap  
696 Waters (uTW1-7), Ground Waters (GW1-7), Rivers Waters (RW1-7), and Waste Waters  
697 (WW1-7).

698

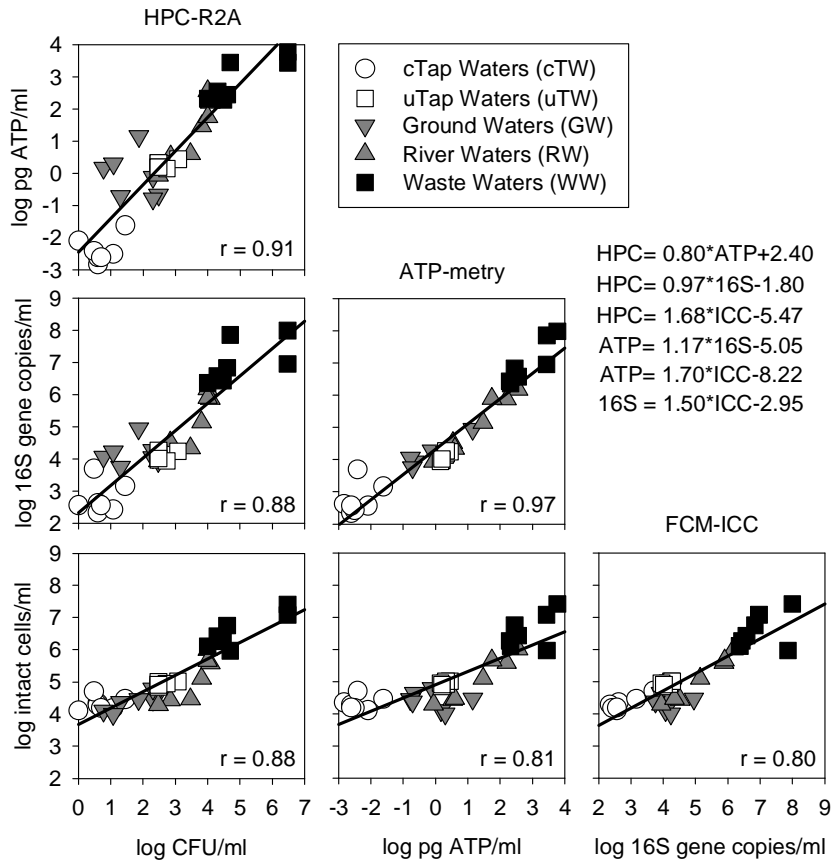

699

700 **Figure 3.** Correlation matrix (log-log) among alternative parameters to assess microbial  
 701 contamination in waters of different origin (i.e., chlorinated and unchlorinated Tap Waters –  
 702 cTW and uTW; Ground Waters – GW; River Waters – RW; Waste Waters – WW). Equations  
 703 of Linear Regression Models (LRMs) are reported, along with Sperman’s correlation  
 704 coefficients ( $r$ ).

705
